# Supplementary material
Source: Springer Nature journal article supplement (https://www.springermedizin.de/resource/supplementary/12889_2011_3759_MOESM4_ESM.pdf/9493228)

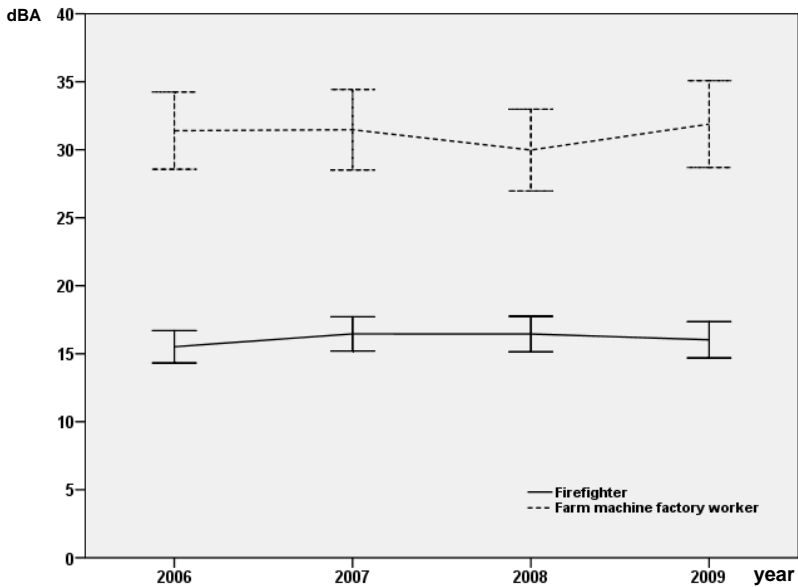

Supplement: MOESM4 [file 9493228]
